# Supplementary material for: Further Probing of Cu2+-Dependent PNAzymes Acting as Artificial RNA Restriction Enzymes
Source: MDPI journal article supplement (doi:10.3390/molecules24040672), 2019-02-14

*Supplementary Information to*

**Further Probing of Cu<sup>2+</sup>-Dependent PNAzymes Acting as Artificial RNA Restriction Enzymes**

**Olivia Luige, Merita Murtola, Alice Ghidini and Roger Strömberg**

Representative chromatograms of the following HPLC analyses are included (time points at which the aliquots were collected indicated in parentheses):

**S1** Cleavage of 3-nucleotide bulge-forming RNAs **1-15** by PNAzyme **I** (24 h)

**S2** ESI MS spectra of fragments (2',3'-cyclic phosphates) produced in the cleavage of RNA **3** and **6**

**S3** Cleavage of (or the lack thereof) modified 4-nucleotide bulge-forming RNAs **16** (1 h) and **17-19** by PNAzyme **I** (24 h) and RNA **16** in the presence of PNA-phenanthrene conjugate (**Y**) (24 h)

**S4** Cleavage of 4-nucleotide bulge-forming RNAs **16, 20-24** (30 min) promoted by PNAzyme **I** or **II**

**S5** RP HPLC analysis of PNAzyme **II**

S1. Cleavage of 3-nucleotide RNA bulge-forming RNAs 1-15 by PNAzyme I (24 h)

RNA 1 (5'-AAA-3')

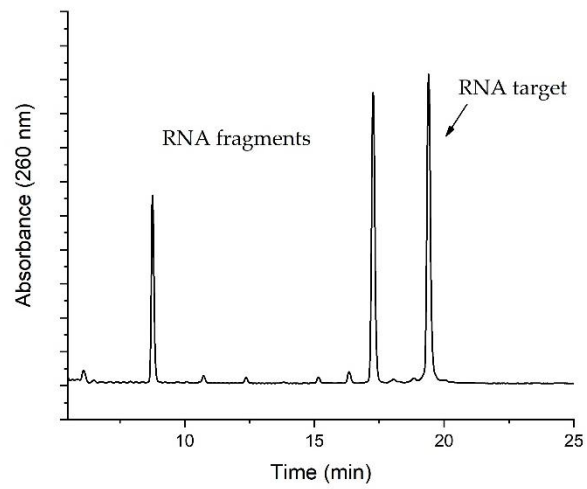

RNA 2 (5'-AUA-3')

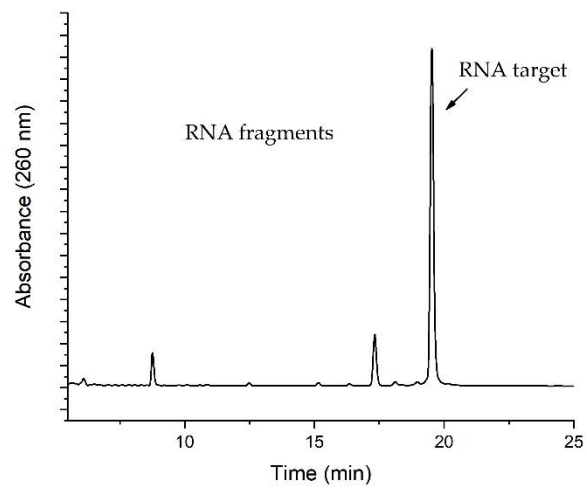

RNA 3 (5'-AGA-3')

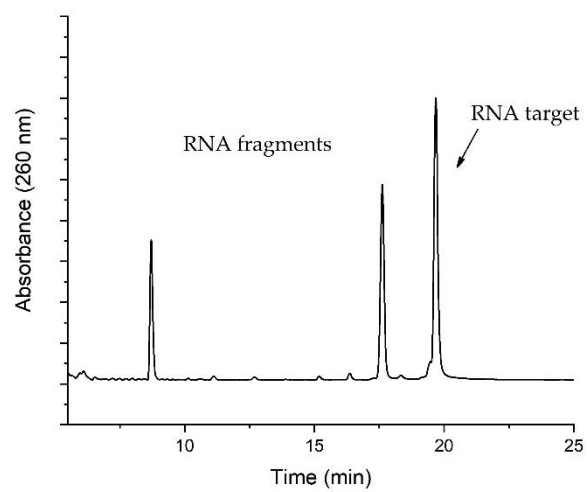

RNA 4 (5'-ACA-3')

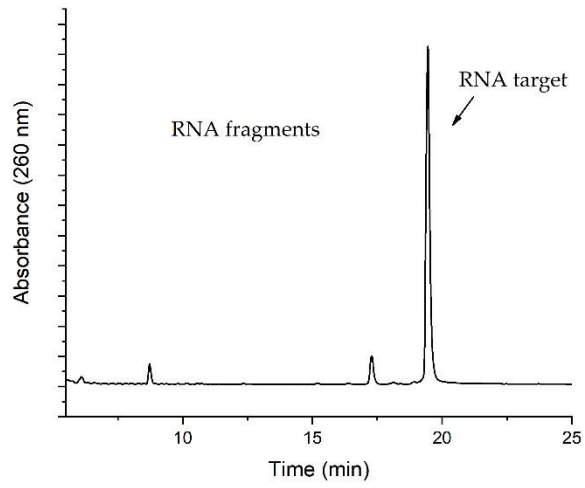

RNA 5 (5'-AAU-3')

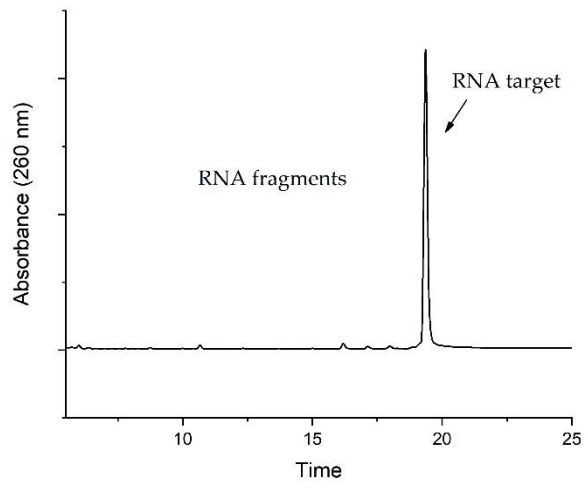

RNA 6 (5'-UAA-3')

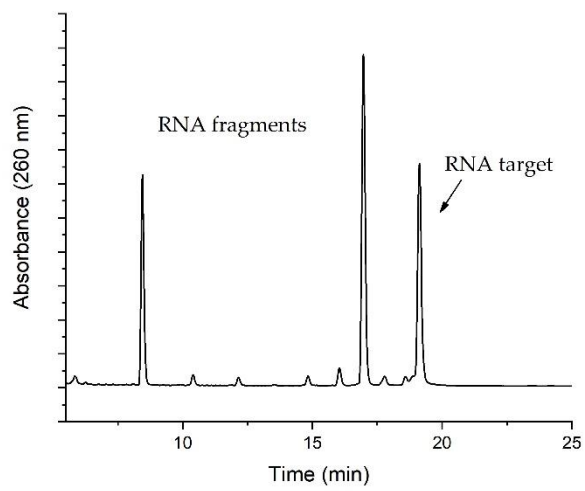

RNA 7 (5'-AUG-3')

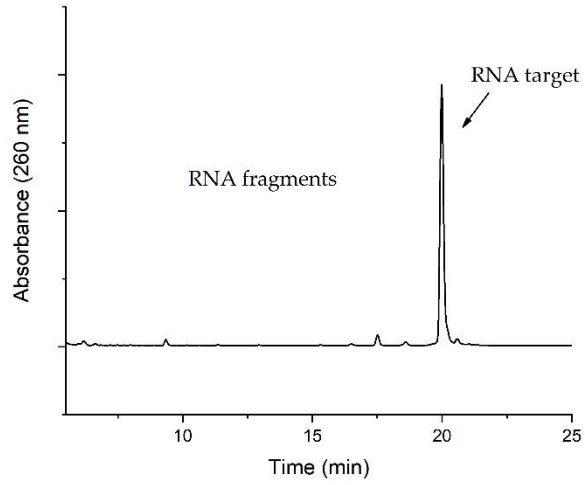

RNA 8 (5'-AUC-3')

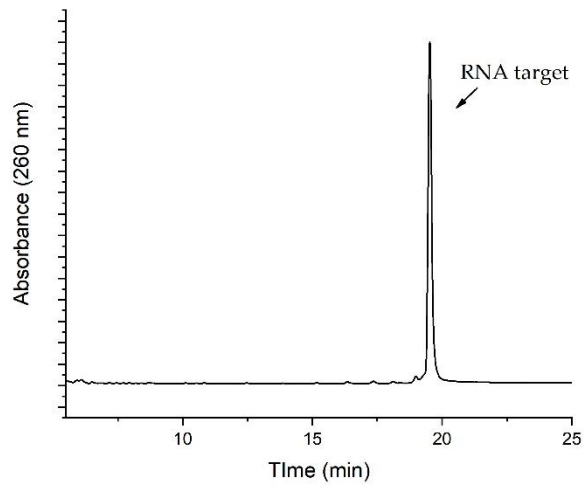

RNA 9 (5'-AUU-3')

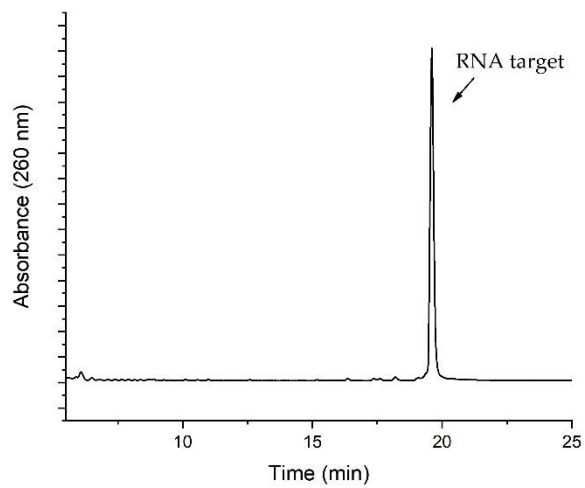

RNA 10 (5'-GUA-3')

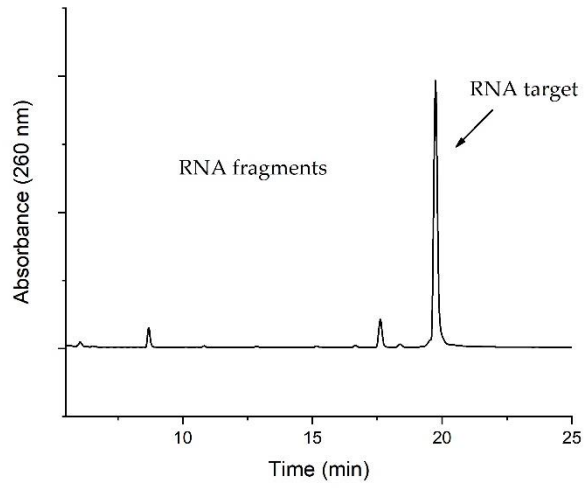

RNA 11 (5'-CUA-3')

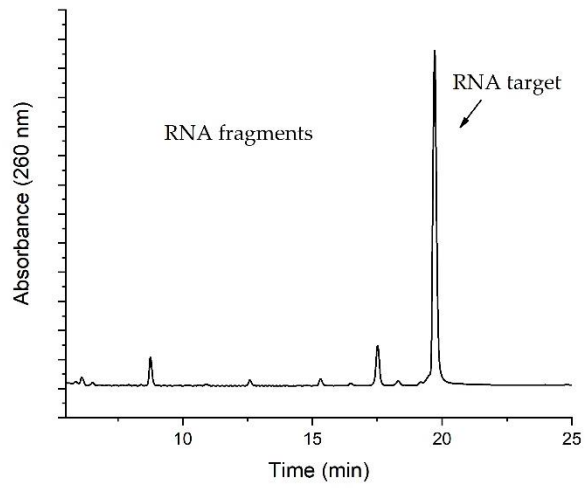

RNA 12 (5'-UUA-3')

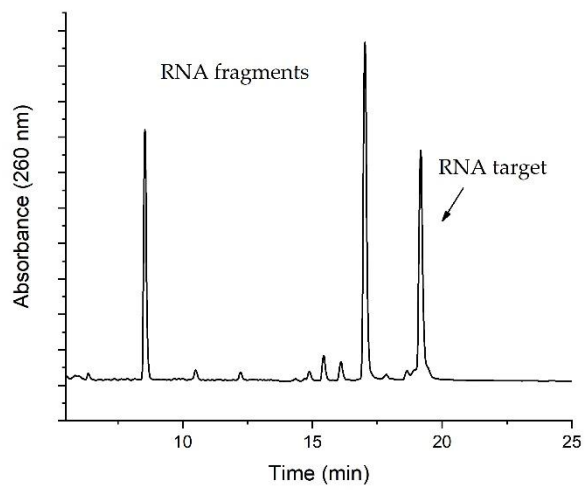

RNA 13 (5'-GUG-3')

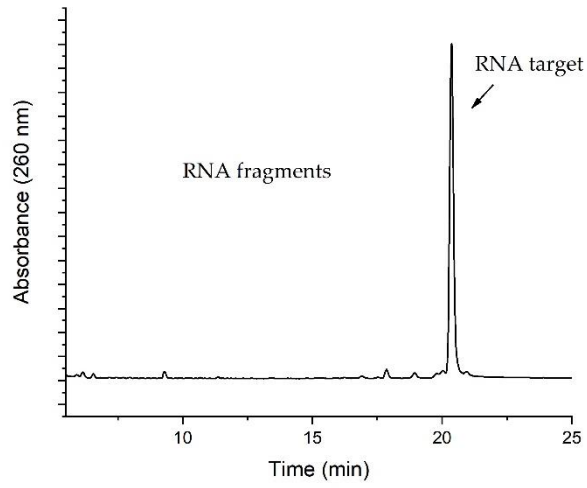

RNA 14 (5'-CUC-3')

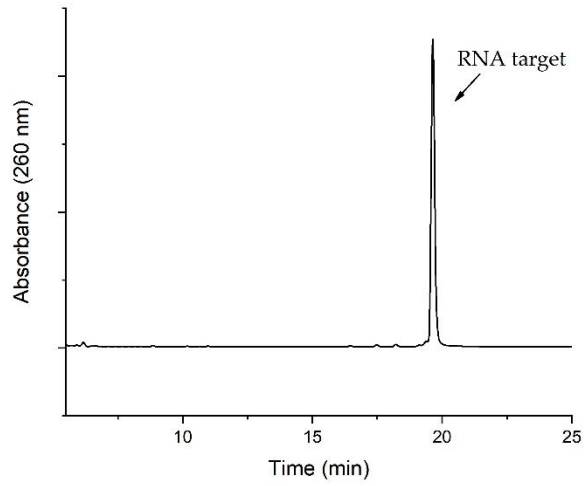

RNA 15 (5'-ACG-3')

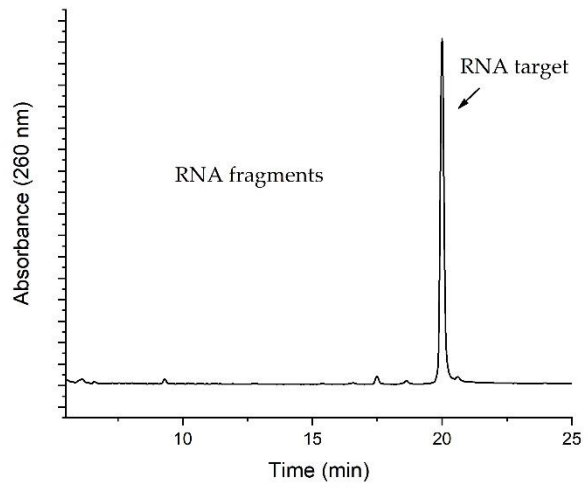

S2 ES MS spectra of fragments (2',3'-cyclic phosphates) produced in the cleavage of RNA 3 and 6

RNA 3 fragment 5'-AGAGUUC-AG-3' cyclic phosphate

$m/z$ :  $C_{87}H_{104}N_{37}O_{62}P_9^{2-}$   $[M]^{-2}$  calcd 1468.7, found 1469.1

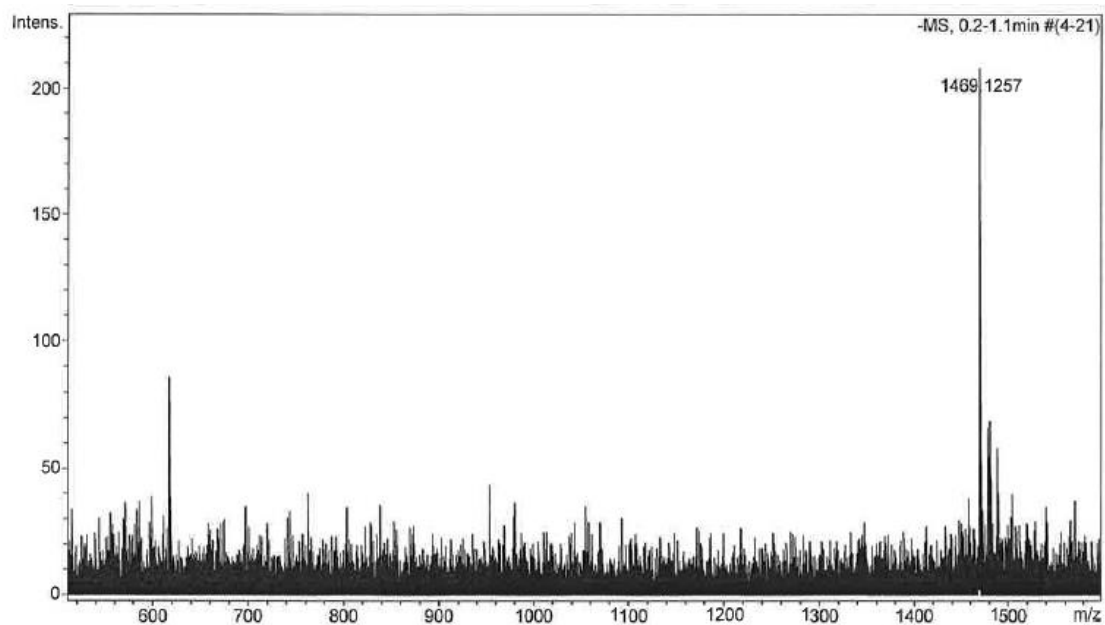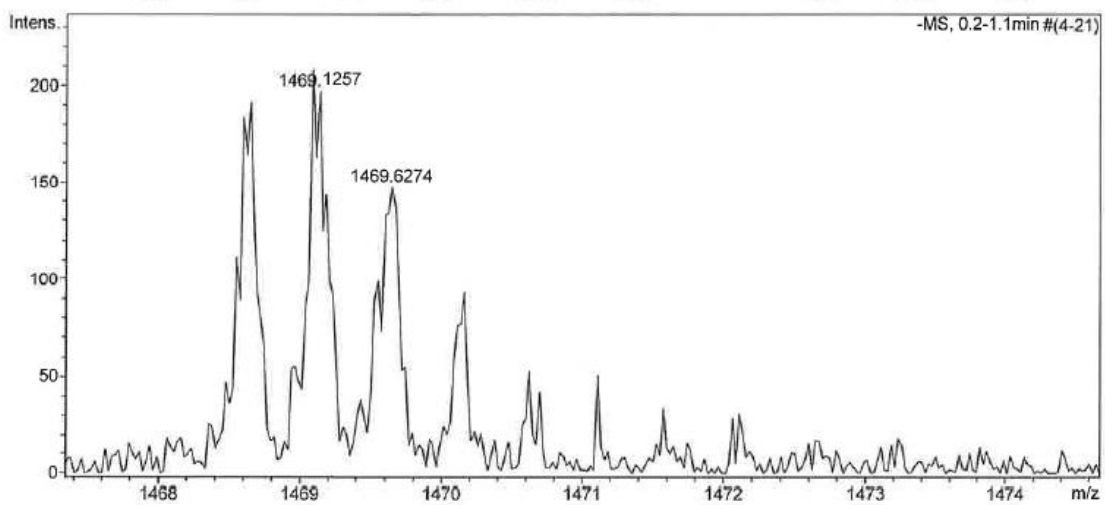

RNA 6 fragment 5'-AGAGUUC-UA-3' cyclic phosphate

$m/z$ :  $C_{86}H_{103}N_{34}O_{63}P_9^{2-}$   $[M]^{-2}$  calcd 1449.2, found 1449.6

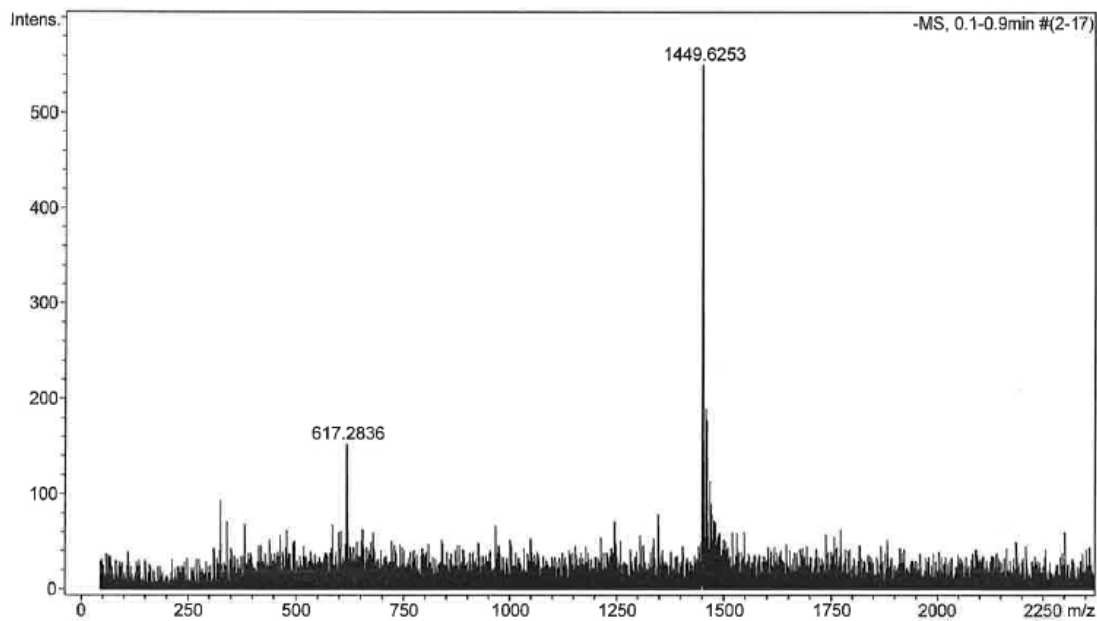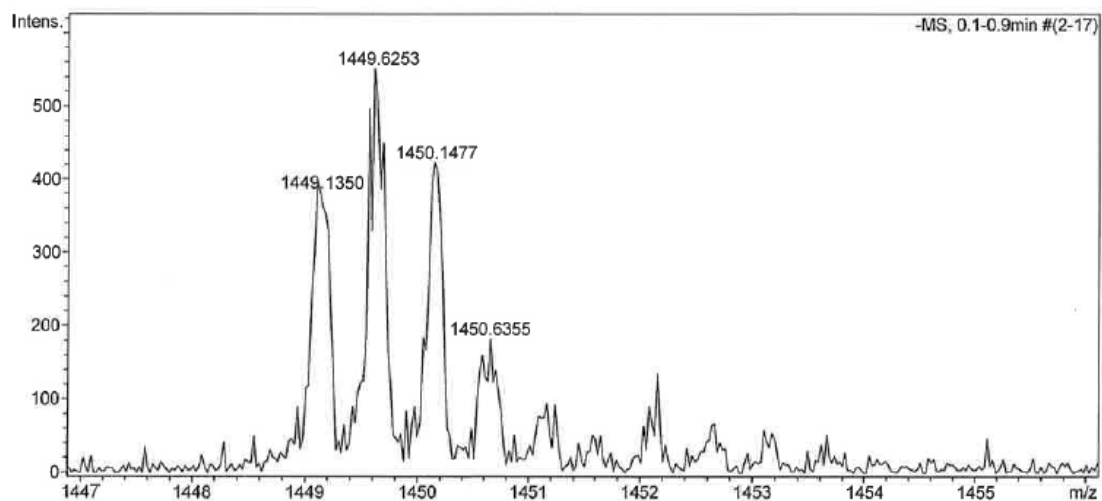



**S3** Cleavage of (or the lack thereof) modified 4-nucleotide bulge-forming RNAs **16** (1 h) and **17-19** (24 h) by PNAzyme **I**, and RNA **16** in the presence of PNA-phenanthrene conjugate (**Y**) (24 h)

RNA **16** (5'-AUAA-3')

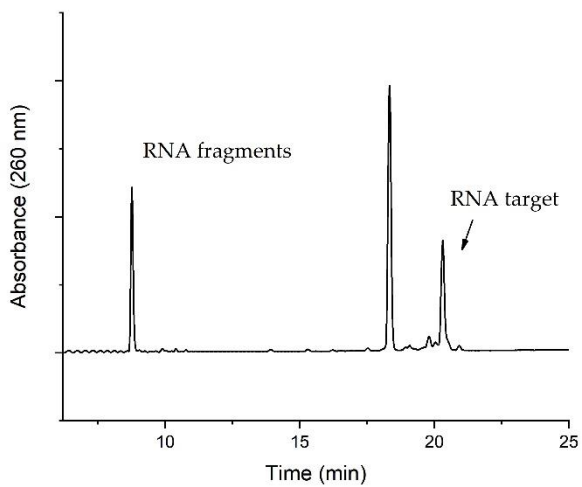

RNA **17** (5'-AUPurA-3')

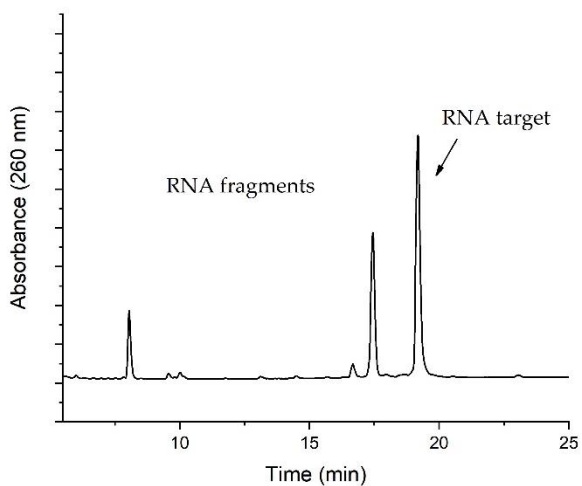

RNA **18** (5'-AUdAA-3')

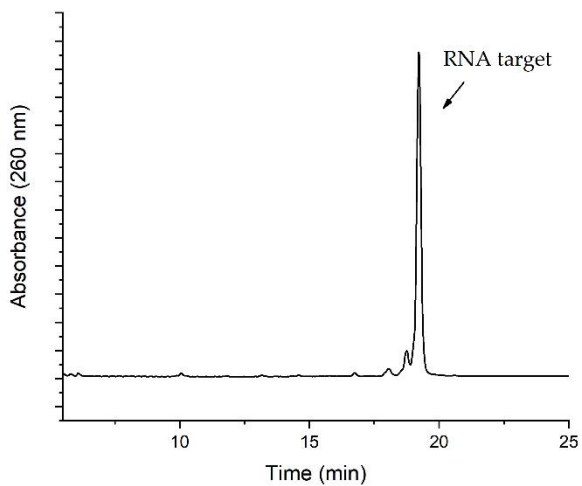

RNA 19 (5'-AUA<sub>2'</sub>OMeA-3')

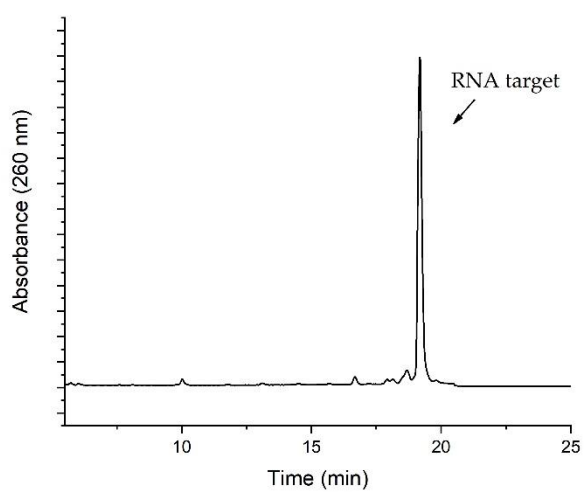

RNA 16 and PNA-phenanthrene conjugate (Y)

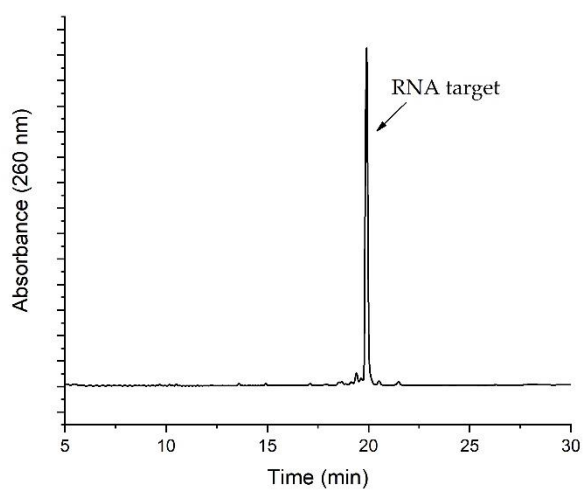

**S4** Cleavage of 4-nucleotides RNAs **16, 20-24** promoted by PNAzyme **I** or **II** (30 min)

PNAzyme **I**-promoted cleavage of RNA **16** (5'-AUAA-3')

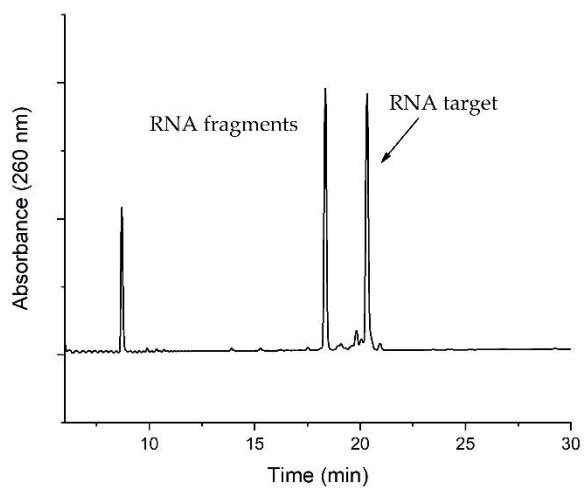

PNAzyme II-promoted cleavage of RNA 16 (5'-AUAA-3')

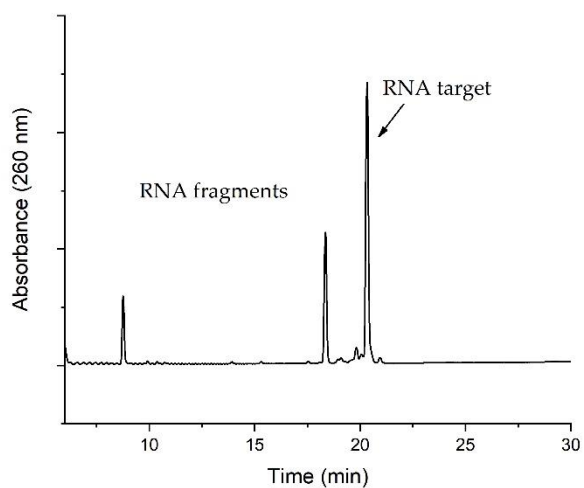

PNAzyme I-promoted cleavage of RNA 20 (5'-AAUA-3')

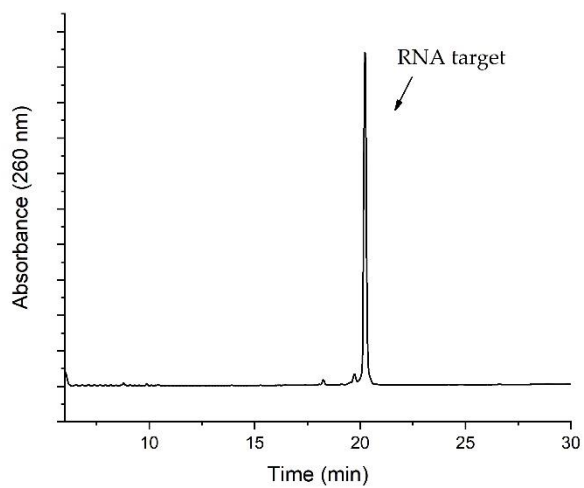

PNAzyme II-promoted cleavage of RNA 20 (5'-AAUA-3')

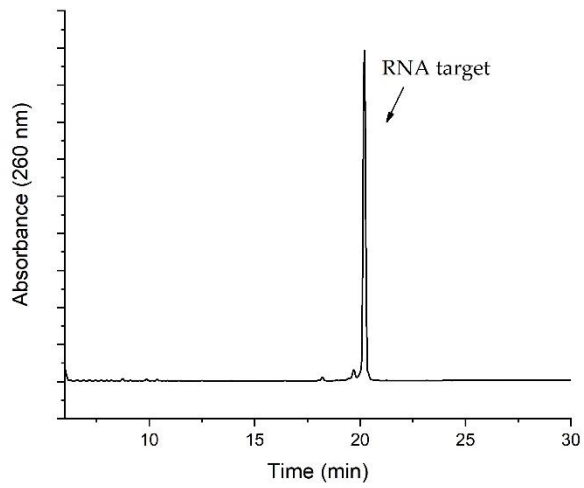

PNAzyme I-promoted cleavage of RNA **21** (5'-AAAA-3')

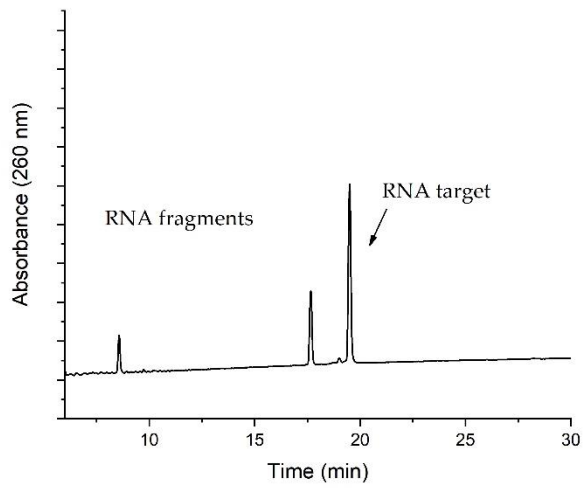

PNAzyme II-promoted cleavage of RNA **21** (5'-AAAA-3')

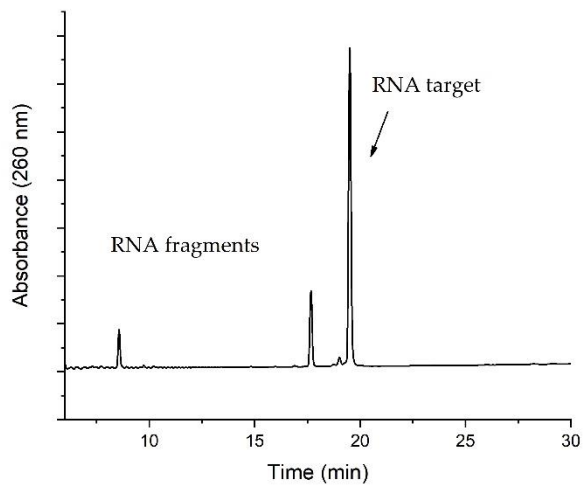

PNAzyme I-promoted cleavage of RNA 22 (5'-ACAA-3')

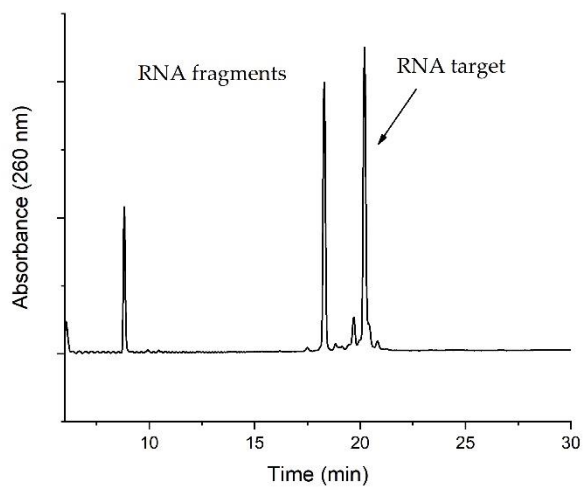

PNAzyme II-promoted cleavage of RNA 22 (5'-ACAA-3')

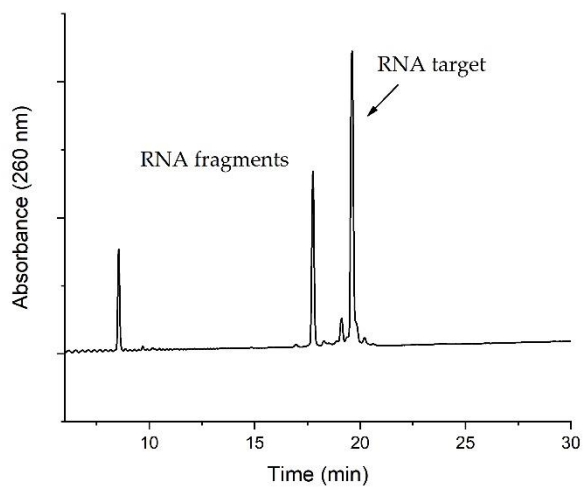

PNAzyme I-promoted cleavage of RNA 23 (36mer 5'-AUAA-3')

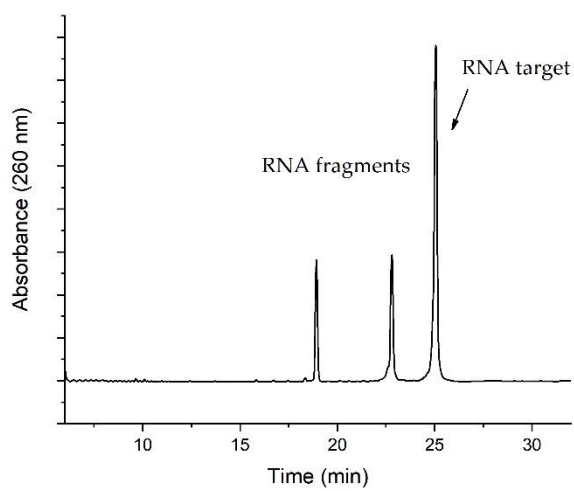

PNAzyme II-promoted cleavage of RNA 23 (36mer 5'-AUAA-3')

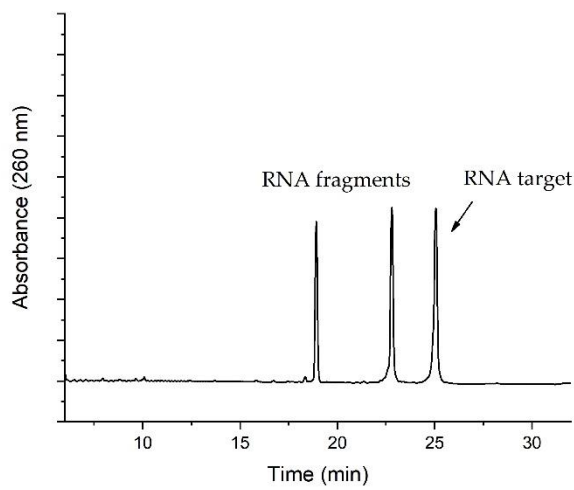

PNAzyme II-promoted cleavage of RNA 24 (36mer 5'-AUAA-3' and 5'-AUAU-3')

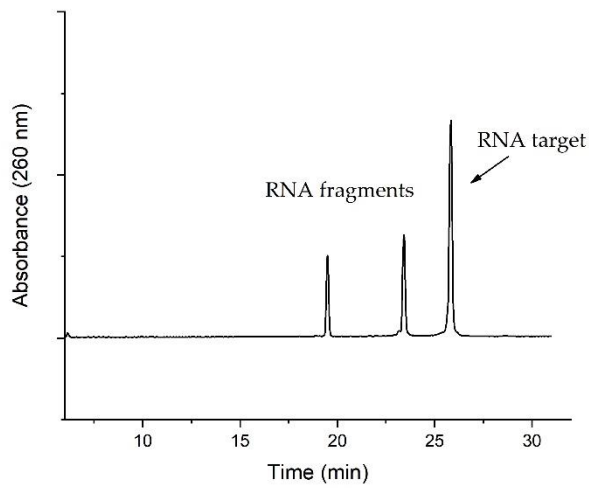

S5 RP HPLC analysis of PNAzyme II

Reference crude unconjugated PNA II:

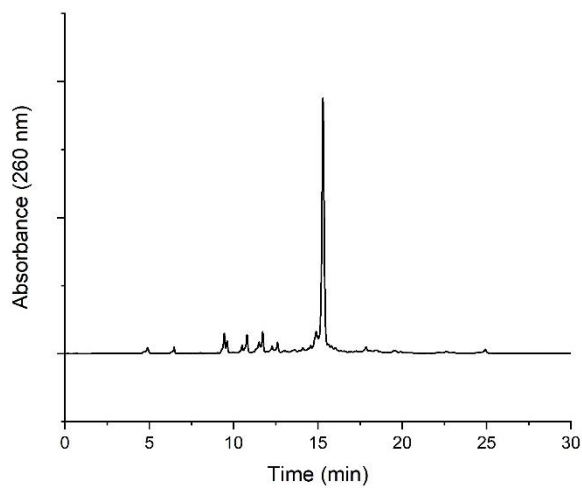

Crude PNzyme II (post conjugation):

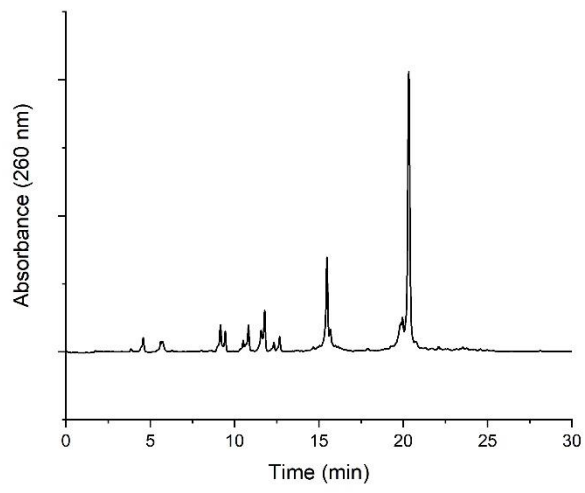

Purified PNzyme II:

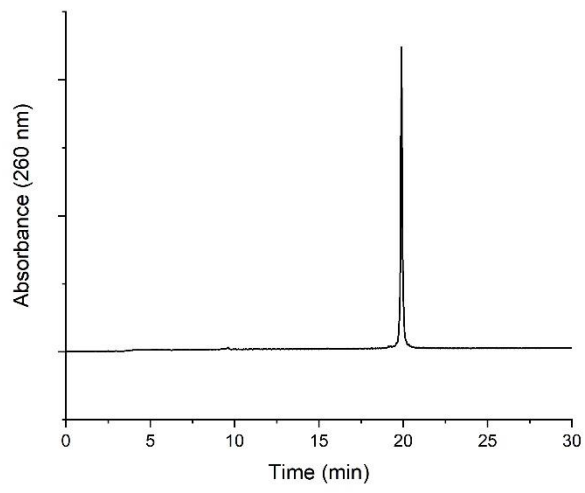

Supplement: s1 [file s1]
